# Supplementary material
Source: PubMed Central journal article supplement (PMC9125827)
Supplement: mmc1.pdf [file mmc1.pdf]

**Structure, Volume 30**

**Supplemental Information**

**Refolding of lid subdomain  
of SARS-CoV-2 nsp14 upon nsp10  
interaction releases exonuclease activity**

**Anna Czarna, Jacek Plewka, Leanid Kresik, Alex Matsuda, Abdulkarim Karim, Colin Robinson, Sean O'Byrne, Fraser Cunningham, Irene Georgiou, Piotr Wilk, Magdalena Pachota, Grzegorz Popowicz, Paul Graham Wyatt, Grzegorz Dubin, and Krzysztof Pyrc**

Supplemental information

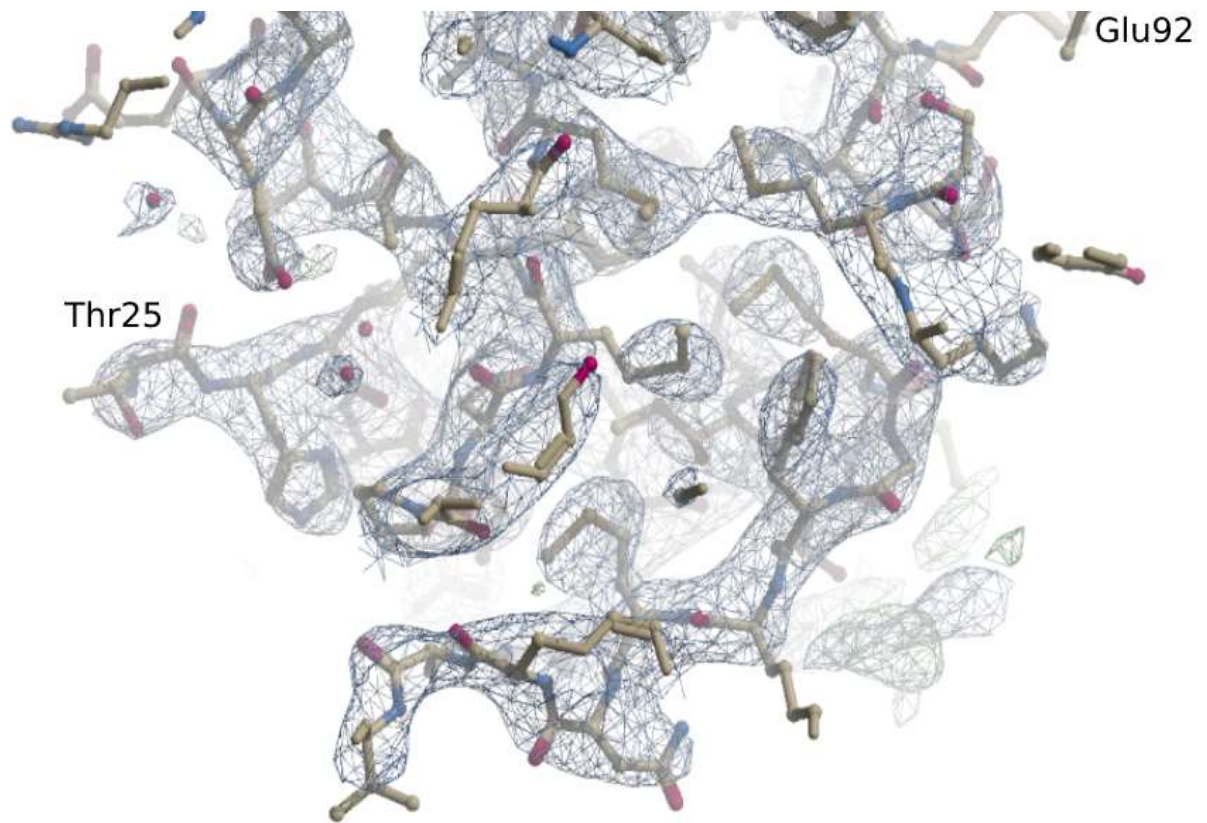

**Figure S1: Related to Figure 1. Overview of the electron density defining the SARS-CoV-2 nsp14 N terminal lid region.** The 2F<sub>o</sub>-F<sub>c</sub> map (blue mesh) is contoured at 1σ. The final model is depicted in stick representation (beige). The density allows for unambiguous determination of residues from 25 to 39 and 45-92. Other residues of the lid region were poorly defined or undefined by the electron density and were not included in the model.

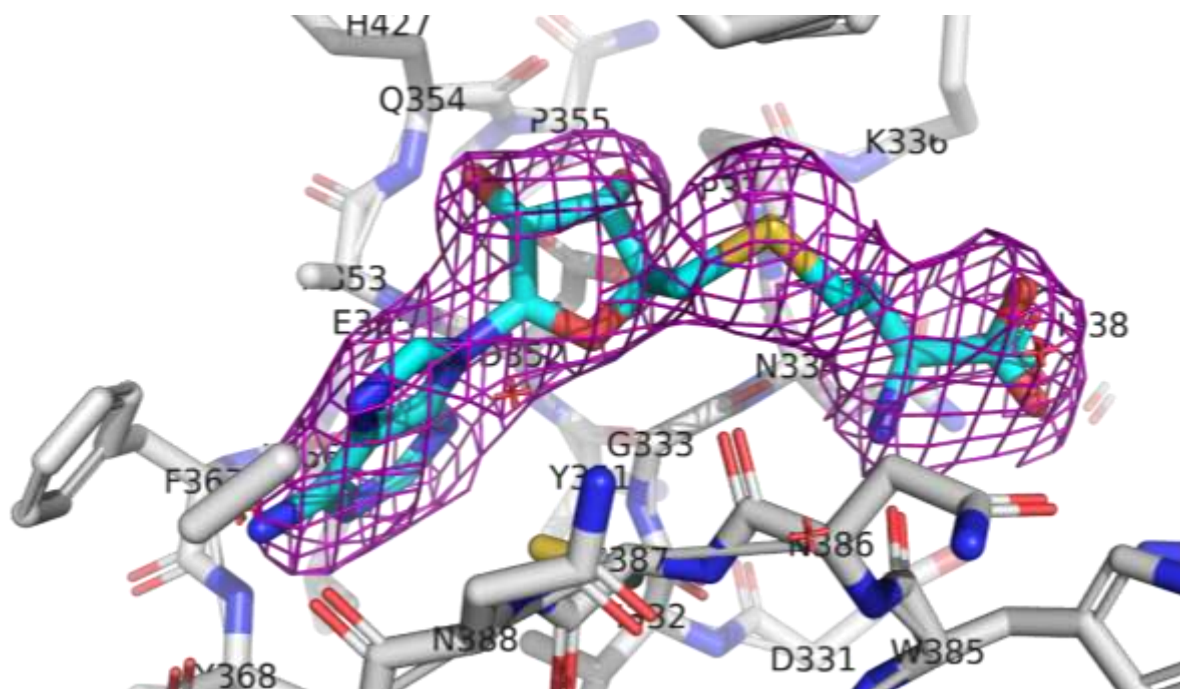

**Figure S2:** Related to Figure 2. Overview of the SAM/SAH binding site. The bound cofactor (SAH) is shown in stick model (blue). The electron density describing the cofactor is shown as the omit map ( $2F_o - F_c$ ) with contour level  $1\sigma$  (magenta mesh). No density describing the methyl moiety at sulphur atom is evident allowing to identify SAH (and not SAM) as a cofactor. Protein model shown in stick representation (gray).

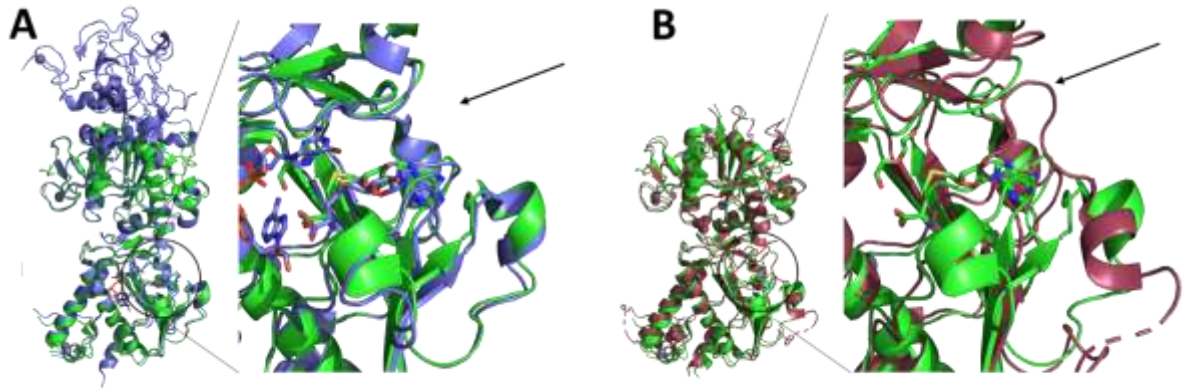

**Figure S3: Related to Figure 2. Overlay of selected nsp14 structures. (A)** Overlay of SARS-CoV-2 nsp14 structure containing SAH (green; this study) and SARS-CoV-1 nsp14/10 complex containing SAH and GpppA (violet; PDB ID:5C8S). No occlusion of the active site is seen. **(B)** Overlay of SARS-CoV-2 nsp14 structure containing SAH (green; this study) and SARS-CoV-2 nsp14 with no cofactor (brown; PDB ID: 7QGI). Significant differences in the orientations of loop connecting  $\beta 2'$  and  $\beta 3'$  strands blocking the active site in the structure not containing the cofactor. **(A, B)** Insets show close-ups of SAM binding pocket (indicated by an arrow). The structures of PDB ID: 7R2V and PDB ID:5C8S overlap ideally with RMSD of 0.802 for 362 atoms showing no occlusion to the active site for both nsp10-free and nsp10-bound structures (green and violet structures in S2 A, respectively). The structures of PDB ID: 7R2V and PDB ID:7QGI have a significant difference with a loop connecting  $\beta 2'$  and  $\beta 3'$  strands blocking the active site (indicated with the arrow) and RMSD of 1.440 for 399 atoms.

**Table S1. Related to STAR★Methods. Nucleotide and amino acid sequences of SARS-CoV-2 nsp14 used in this study.**

|                                                                                                                                                                                                                                                                                                                                                                                                                                                                                                                                                                                                                                                                                                                                                                                                                                                                                                                                                                                                                                                                                                                                                                                                                                                                                                                                                                                                                                                                                                                                                                                                                                                                                       |
|---------------------------------------------------------------------------------------------------------------------------------------------------------------------------------------------------------------------------------------------------------------------------------------------------------------------------------------------------------------------------------------------------------------------------------------------------------------------------------------------------------------------------------------------------------------------------------------------------------------------------------------------------------------------------------------------------------------------------------------------------------------------------------------------------------------------------------------------------------------------------------------------------------------------------------------------------------------------------------------------------------------------------------------------------------------------------------------------------------------------------------------------------------------------------------------------------------------------------------------------------------------------------------------------------------------------------------------------------------------------------------------------------------------------------------------------------------------------------------------------------------------------------------------------------------------------------------------------------------------------------------------------------------------------------------------|
| Nucleotide sequence:                                                                                                                                                                                                                                                                                                                                                                                                                                                                                                                                                                                                                                                                                                                                                                                                                                                                                                                                                                                                                                                                                                                                                                                                                                                                                                                                                                                                                                                                                                                                                                                                                                                                  |
| (ggc)atggctgaaaatgtaacaggactctttaagattgtagtaaggtaatcactgggttacatcctacacaggcacctacacac<br>ctcagtggtgacactaaattcaaaactgaaggtttatgtgttgacatacctggcatacctaaggacatgacctatagaagactcatc<br>tctatgatgggttttaaaatgaattatcaagtaatggttaccctaacatgtttatcacccgcaagaagctataagacatgtacgtg<br>catggattggcttcgctgtagctgggtgctatgctactagagaagctgttggtaccaattacctttacagctagggttttctacaggt<br>gttaacctagttgctgacctacaggttatgttgatacacctaataatacagattttccagagttagtgtctaaaccaccgctggag<br>atcaattaaacacctcataccacttatgtacaaaggacttccttggatgtagtgcgtataaagattgtacaaatgtaagtgaca<br>cacttaaaatctctctgacagagtcgtatgttcttatgggcacatggctttgagttgacatctatgaagtattttgtgaaaatagg<br>acctgagcgcacctgttgctatgtgatagcgtgccacatgctttccactgcttcagacacttatgcctgttggcatcattctattg<br>gatttgattacgtctataatccgtttatgattgatgtcaacaatggggtttacaggtaacctacaagcaacctgatctgtattgt<br>caagccatggtaatgacatgtagctagttgtgatgcaatcatgactaggtgtctagctgtccacgagtgctttgtaagcgtgtg<br>actggactattgaatacctataattggtgatgaactgaagattaatcgggctttagaaaaggttcaacacatggttgttaaagctg<br>cattattagcagacaaattcccagttcttcagacattggtaaccctaaagctattaagtgtgtacctcaagctgatgtagaatgga<br>agttctatgatgcacagcctgtagtgacaaagctataaaatagaagaattattctattcttatgccacacattctgacaaattcac<br>agatgggtgatgcctatgttgaattgcaatgctgatagatatctgctaattccattgtttgtagattgacactagagtgctatcta<br>accttaactgcctgggttgatgggtggcagtttgatgtaataaacatgcattccacacaccagcttttgataaaagtgctttgtt<br>aatttaaaacaattaccattttctattactctgacagtcctatgtgagtcctatggaaaacaagtagtgcagatatagattatgtac<br>cactaaagtctgctacgtgtataacacgttgcaatttaggtggctgtctgtagacatcatgctaagtagtacagattgtatctcga<br>tgcttataacatgatgatctcagctggctttagcttgggtttacaacaatttgatactataacctctggaacacttttacaagac<br>ttcag |
| Amino acid sequence                                                                                                                                                                                                                                                                                                                                                                                                                                                                                                                                                                                                                                                                                                                                                                                                                                                                                                                                                                                                                                                                                                                                                                                                                                                                                                                                                                                                                                                                                                                                                                                                                                                                   |
| (G)MAENV TGLFKDCSKVITGLHPTQAPTHLSVDTKFKTEGLCVDIPGIPKDM TYRRLISMMGFKMNYQ<br>VNGYPNMFITREEAIRHVRAWIGFAVAGCHATREAVGTNLPLQLGFSTGVNLVAVPTGYVDTPNNTDF<br>SRVSAKPPPGDQFKHLIPLMYKGLPWNVVRKIVQMLS DTLKNLS DRVVFVLWAHGFELTSMKYFVKIG<br>PERTCCLDRRATCFSTASD TYACWHHSIGFDYVYNPFMIDVQQWGF TGNLQSNHDLYCQVHGN AH<br>VASCDAIMTRCLAVHECFVKRVDW TIEYPIIGDELKINAACR KVQH MVVKAALLADKFPVLHDIGNPKAI<br>KCV PQADVEWKFYDAQPCSDKAYKIEELFYSYATHSDKFTDGVCLFWNCNVDRYPANSIVCRFDTRVLS<br>NLNLP GCDGGS LYVNKHAFHTPAFDKSAFVNLKQLPFFYSDSPCESHGKQVVS DIDYVPLKSATCITRC<br>NLGGAVCRHHANEYRLYLDA YNMMISAGFSLWVYKQFD TYNLWNTFTRLQ                                                                                                                                                                                                                                                                                                                                                                                                                                                                                                                                                                                                                                                                                                                                                                                                                                                                                                                                                                                                                                                                                          |

The initial glycine residue in parentheses is a part of TEV recognition site and remains appended to nsp14 sequence in the purified nsp14. Table with nucleotide and amino acid sequence for SARS-CoV-2 nsp14 used in in this study.
